# Supplementary material for: High-Quality Library Preparation for NGS-Based Immunoglobulin Germline Gene Inference and Repertoire Expression Analysis
Source: PubMed Central journal article supplement (PMC6459949; doi:10.3389/fimmu.2019.00660), 2019-04-05
Supplement: Presentation_1.pdf [file Presentation_1.pdf]

## *Supplementary Material*

# High-Quality Library Preparation for NGS-Based Immunoglobulin Germline Gene Inference and Repertoire Expression Analysis

Néstor Vázquez Bernat<sup>1</sup>, Martin Corcoran<sup>1</sup>, Uta Hardt<sup>1,2</sup>, Mateusz Kaduk<sup>1</sup>, Ganesh E. Phad<sup>1</sup>, Marcel Martin<sup>3</sup> and Gunilla B. Karlsson Hedestam<sup>1,\*</sup>

### \* Correspondence:

Gunilla B. Karlsson Hedestam, Department of Microbiology, Tumor and Cell Biology, Karolinska Institutet, Box 280, S-171 77 Stockholm, Sweden. E-mail: [Gunilla.Karlsson.Hedestam@ki.se](mailto:Gunilla.Karlsson.Hedestam@ki.se)

## 1 Supplementary Protocols

### 1.1 5'RACE immunoglobulin library preparation protocol

1. Extract the RNA from PBMC using Qiagen's RNeasy® Mini Kit (cat. no. 74104).
2. Determine RNA concentration obtained and use 200 ng in subsequent library preparations.
3. cDNA synthesis with Thermo Scientific's SuperScript™ II Reverse Transcriptase (cat. no. 18064014):

#### Reaction mix:

- 200 ng RNA (X  $\mu$ l)
- 11-X  $\mu$ l nuclease free H<sub>2</sub>O
- 1  $\mu$ l 10 mM Oligo-dt
- 1  $\mu$ l 10 mM dNTPs

Incubate for 5 min at 72°C and then bring it down to 4°C.

#### Add:

- 4  $\mu$ l 5X FS buffer
- 1  $\mu$ l 0.1 M DTT
- 1  $\mu$ l RiboBlock RNase inhibitor
- 1  $\mu$ l Superscript II

Incubate for 1 h at 42°C.

#### Add (inside the PCR machine):

- 1  $\mu$ l 10  $\mu$ M Read1\_TS
- 0.5  $\mu$ l Superscript II
- 0.5  $\mu$ l 5X FS buffer

Incubate for 1 h and 30 min at 42°C, 10 min at 72°C and then bring it down again to 4°C.

4. Purify the cDNA synthesis product with Thermo Scientific's GeneJET PCR Purification Kit (cat. no. K0701) (elute with 25  $\mu$ l of EB).
5. cDNA amplification PCR:

**Semi-Nested 1 mix:**

- 2  $\mu$ l cDNA
- 6.5  $\mu$ l nuclease free H<sub>2</sub>O
- 0.5  $\mu$ l 10 mM 5' Read1U primer
- 1  $\mu$ l 10 mM 3' chain-specific outer primer
- 10  $\mu$ l KAPA mix

**Semi-Nested 2 mix:**

- 10  $\mu$ l PCR 1 product
- 0.5  $\mu$ l 10 mM 5' Read1U primer
- 1  $\mu$ l 10 mM 3' chain-specific inner primer
- 11.5  $\mu$ l KAPA mix

**PCR protocol:**

- 96°C 5 min
  - 95°C 20 sec
  - 69°C 20 sec
  - 72°C 20 sec
  - 72°C 5 min
- } 20 cycles

PCR purification  
(elute in 10  $\mu$ l)

**PCR protocol:**

- 96°C 5 min
  - 95°C 20 sec
  - 69°C 20 sec
  - 72°C 20 sec
  - 72°C 5 min
- } 10 cycles

KAPA mix: Kapa Biosystems' KAPA HiFi HotStart ReadyMix PCR Kit (cat. no. KR0370)

6. Run the PCR product in a 1% Agarose gel in TAE and cut the band.
7. Purify the gel band with the Thermo Scientific's GeneJET Gel Extraction Kit (cat. no. K0692) and (elute with 25  $\mu$ l of EB).
8. Determine concentration obtained.
9. Index PCR:

**Initial mix:**

- 2  $\mu$ l 10 mM P5\_R1 (Read1U with P5)
- 2  $\mu$ l 10 mM P7\_R2 (Read2U with index and P7)
- 10 ng purified PCR product (X  $\mu$ l)
- 21-X  $\mu$ l nuclease free H<sub>2</sub>O
- 25  $\mu$ l Kapa Biosystems' KAPA HiFi HotStart ReadyMix PCR Kit (cat. no. KR0370)

**PCR protocol:**

- 96°C 5 min
  - 95°C 30 seconds
  - 68°C 30 seconds
  - 72°C 30 seconds
  - 72°C 10 min
- } 10 cycles

10. Purify PCR product using Qiagen's MinElute PCR Purification Kit (cat. no. 28006) (elute with 50  $\mu$ l of DNase and RNase free H<sub>2</sub>O H<sub>2</sub>O) and proceed to Illumina's bead purification.

## 1.2 5'MTPX i mMunoglobulin library preparation protocol

1. Extract the RNA from PBMC using Qiagen's RNeasy® Mini Kit (cat. no. 74104).
2. Determine RNA concentration obtained and use 200 ng in subsequent procedure.
3. cDNA synthesis with Qiagen's Sensiscript RT Kit (cat. no. 205211):

### Reaction mix:

- 200 ng RNA (X µl)
- 12-X µl nuclease free H<sub>2</sub>O
- 2 µl 10 mM Class specific primer (with UMI and Read2U sequence)
- 2 µl dNTP Mix (5 mM each dNTP)

Incubate for 5 min at 65°C, 5 min at 37°C and then place the reaction mixtures on ice.

### Add from a pre-mix:

- 2 µl 10xbuffer RT
- 1 µl ¼ RiboBlock RNase inhibitor
- 1 µl Sensiscript RT

Incubate for 1 h at 37°C, then 10 min at 72°C and then bring it down again to 4°C.

4. Purify the cDNA synthesis product with Thermo Scientific's GeneJET PCR Purification Kit (cat. no. K0701) (elute with 20 µl of EB).
5. cDNA amplification PCR:

### Reaction mix:

- 2 µl cDNA (4 µl if necessary)
- 5 µl nuclease free H<sub>2</sub>O
- 1 µl 10 mM 3' Read2U
- 2 µl 1/10 0.1 M 5' Forward mixture (with Read1U sequence)
- 10 µl Kapa Biosystems' KAPA HiFi HotStart ReadyMix PCR Kit (cat. no. KR0370)

### PCR protocol:

- 96°C 5 min
  - 95°C 20 sec
  - 68°C 20 sec
  - 72°C 20 sec
  - 72°C 5 min
- } 25 cycles

6. Run the PCR product in a 1% Agarose gel in TAE and cut the band.
7. Purify the gel band with the Thermo Scientific's GeneJET Gel Extraction Kit (cat. no. K0692) and (elute with 25 µl of EB).
8. Determine concentration obtained.

9. Index PCR:

**Initial mix:**

- 2  $\mu$ l 10 mM P5\_R1 (Read1U with P5)
- 2  $\mu$ l 10 mM P7\_R2 (Read2U with index and P7)
- 5-10 ng purified PCR product (X  $\mu$ l)
- 21-X  $\mu$ l nuclease free H<sub>2</sub>O
- 25  $\mu$ l Kapa Biosystems' KAPA HiFi HotStart ReadyMix PCR Kit (cat. no. KR0370)

**PCR protocol:**

- 96°C 5 min
  - 95°C 30 sec
  - 68°C 30 sec
  - 72°C 30 sec
  - 72°C 10 min
- } 10 cycles

10. Purify PCR product using Qiagen's MinElute PCR Purification Kit (cat. no. 28006) (elute with 50  $\mu$ l of DNase and RNase free H<sub>2</sub>O) and proceed to Illumina's bead purification.
