# Supplementary material for: High-Quality Library Preparation for NGS-Based Immunoglobulin Germline Gene Inference and Repertoire Expression Analysis
Source: PubMed Central journal article supplement (PMC6459949; doi:10.3389/fimmu.2019.00660), 2019-04-05
Supplement: Table_1.pdf [file Table_1.pdf]

**Supplemental table 1.** Primers used for library preparation in 5'RACE.

| <b>5'RACE</b>     |                                                      |
|-------------------|------------------------------------------------------|
| <b>5' primers</b> |                                                      |
| Read1_TS          | CTACACTCTTCCCTACACGACGCTCTCCGATCTNNNNNNNNNNNrGrGrGrG |
| Read1U            | CTACACTCTTCCCTACACGACGCTCTCCGATCT                    |
| <b>3' primers</b> |                                                      |
| Hu_IgM_RACE_In    | CAGACGTGTGCTCTCCGATCTGGGAATTCTCACAGGAGACGAGGGGAAA    |
| Hu_IgK_RACE_In    | CGTGTGCTCTCCGATCTCGGGeAAGATGAAGACAGATGGTGCAGC        |
| Hu_IgL_RACE_In1   | GGAGTTCAGACGTGTGCTCTCCGATCTGAGGAGGGCGGGAACAGAGTGAC   |
| Hu_IgL_RACE_In2   | GGAGTTCAGACGTGTGCTCTCCGATCTCAGAGGGTGGGAACAGAGTGAC    |
| Hu_IgM_RACE_Out   | GCCAACGGCCACGCTGCTCGTATCCGA                          |
| Hu_IgK_RACE_Out   | GGCCTCTGGGATAGAAGTTATTCAGCAGGC                       |
| Hu_IgL_RACE_Out1  | GACACACTAGTGTGGCCTTGTGGCTTG                          |
| Hu_IgL_RACE_Out2  | GACACACCAGTGTGGCCTTGTGGCTTG                          |
| Hu_IgL_RACE_Out3  | GGCACACCAGTGTGGCCTTGTGGCTTG                          |
| Hu_IgL_RACE_Out4  | GACACACCAGCATGGCCTTGTGGCTTG                          |
