# Supplementary material for: High-Quality Library Preparation for NGS-Based Immunoglobulin Germline Gene Inference and Repertoire Expression Analysis
Source: PubMed Central journal article supplement (PMC6459949; doi:10.3389/fimmu.2019.00660), 2019-04-05
Supplement: Table_2.pdf [file Table_2.pdf]

**Supplemental table 2. Primers used for library preparation in 5'MTPX.**

| <b>5'MTPX</b>     |                                                                                      |
|-------------------|--------------------------------------------------------------------------------------|
| <b>3' primers</b> |                                                                                      |
| Hu_IgM_MTPX       | GGAGTTCAGACGTGTGCTCTCCGATCTHHHHHACAHHHHHACAHHHHNHCCGACGGGAATTCTCACAGGAGACGAGGGGAAAAG |
| Hu_IgM_MTPX-50    | GGAGTTCAGACGTGTGCTCTCCGATCTHHHHHACAHHHHHACAHHHHGAGTTGTTCTTGTATTTCCAGGAGAAAGTGATGGA   |
| Hu_IgM_MTPX-100   | GGAGTTCAGACGTGTGCTCTCCGATCTHHHHHACAHHHHHACAHHHHCCCTCTCAGGACTGATGGGAAGC               |
| Hu_IgM_MTPX-150   | GGAGTTCAGACGTGTGCTCTCCGATCTHHHHHACAHHHHHACAHHHHCGTCCTTGGAAAGGCAGCAGCACC              |
| Hu_IgG_MTPX       | GGAGTTCAGACGTGTGCTCTCCGATCTHHHHHACAHHHHHACAHHHHGCCAGGGGAAGACCGATGGG                  |
| Hu_IgK_MTPX       | GGAGTTCAGACGTGTGCTCTCCGATCTHHHHHACAHHHHHACAHHHHNGGGATAGAAGTTATTCAGCAGGCACACAACAGAG   |
| Hu_IgL_MTPX       | GGAGTTCAGACGTGTGCTCTCCGATCTHHHHHACAHHHHHACAHHHHTGGCTTGRAGCTCCTCAGAGGAGG              |
| Read2U            | GGAGTTCAGACGTGTGCTCTCCGATCT                                                          |
| <b>5' primers</b> |                                                                                      |
| Hu_VH_MTPX_1      | CCTACACGACGCTCTCCGATCTGGTGGCAGCAGTCACAGATGCCTACTC                                    |
| Hu_VH_MTPX_2      | CCTACACGACGCTCTCCGATCTGGTGGCAGCAGCCACAGGTGCCCACTC                                    |
| Hu_VH_MTPX_3      | CCTACACGACGCTCTCCGATCTGGTGGCAGCAGCTACAGGTGTCCAGTC                                    |
| Hu_VH_MTPX_4      | CCTACACGACGCTCTCCGATCTGGTGGGAGCAGCAACARGWGCCCCACTC                                   |
| Hu_VH_MTPX_5      | CCTACACGACGCTCTCCGATCTGCTGGCTGTAGCTCCAGGTGCTCACTC                                    |
| Hu_VH_MTPX_6      | CCTACACGACGCTCTCCGATCTCCTGCTGCTGACCAYCCCTTGMTGGTCTTGTC                               |
| Hu_VH_MTPX_7      | CCTACACGACGCTCTCCGATCTCCTGCTACTGACTGTCCCGTCTGGGTCTTATC                               |
| Hu_VH_MTPX_8      | CCTACACGACGCTCTCCGATCTGGGTTTTCTCGTTGCTCTTTAAAGAGGTGCCAGTG                            |
| Hu_VH_MTPX_9      | CCTACACGACGCTCTCCGATCTGGGTTTTCTTGTGCTATTTAAAAGGTGCCARTG                              |
| Hu_VH_MTPX_10     | CCTACACGACGCTCTCCGATCTGGATTTTCTTGTGCTATTTAAAAGGTGCCAGTG                              |
| Hu_VH_MTPX_11     | CCTACACGACGCTCTCCGATCTGGGTTTTCTTKKGCTATWTTAGAAGGTGCCAGTG                             |
| Hu_VH_MTPX_12     | CCTACACGACGCTCTCCGATCTGGTGGCRGCTCCAGATGGGTCTGTGTC                                    |
| Hu_VH_MTPX_13     | CCTACACGACGCTCTCCGATCTGGCTGTTCTCCAAGGAGTCTGTG                                        |
| Hu_VH_MTPX_14     | CCTACACGACGCTCTCCGATCTGGCTCCCATGGGGTGCCTGTGTC                                        |
| Hu_VH_MTPX_15     | CCTACACGACGCTCTCCGATCTGGTGGCAGCAGCAACAGGTGCCCACT                                     |
| Hu_VH_MTPX_16     | CACCTTTCCCTACACGACGCTCTCCGATCTATGGAAGTGGGGTCCGCTGGGTTTTCC                            |
| Hu_VH_MTPX_17     | CACCTTTCCCTACACGACGCTCTCCGATCTATGGAAGTGGGGTCCGCTGGGTTTTCC                            |
| Hu_VH_MTPX_18     | CACCTTTCCCTACACGACGCTCTCCGATCTGGCTGAGCTGGGTTTTYCCCTGTGTC                             |
| Hu_VH_MTPX_19     | CACCTTTCCCTACACGACGCTCTCCGATCTGGAGTTKGGGCTGMGCTGGGTTTTCC                             |
| Hu_VH_MTPX_20     | CACCTTTCCCTACACGACGCTCTCCGATCTGCACCTGTGGTTTTCTCTGCTGGTG                              |
| Hu_VH_MTPX_21     | CACCTTTCCCTACACGACGCTCTCCGATCTCACCTGTGGTTCTCTCTCTCTGG                                |
| Hu_VH_MTPX_22     | CACCTTTCCCTACACGACGCTCTCCGATCTCCAGGATGGGGTCAACCGCCATCTC                              |
| Hu_VH_MTPX_23     | CTCTTTCCCTACACGACGCTCTCCGATCTCAGAGGACTCACCATGGAGTTGGGCTGAG                           |
| Hu_VH_MTPX_24     | CCTACACGACGCTCTCCGATCTGGACTCACCATGGAGTTGGGACTGAGC                                    |
| Hu_VH_MTPX_25     | CCTACACGACGCTCTCCGATCTGGGCTGAGCTGGCTTTTTCTTGTGGC                                     |
| Hu_VK_MTPX_1      | CTACACTTTCCCTACACGACGCTCTCCGATCTATGTTGCCATCAAACTCATTGGGTTTCTG                        |
| Hu_VK_MTPX_2      | CTACACTTTCCCTACACGACGCTCTCCGATCTATGGAARCCCAAGCGCAGCTTCTCTTCC                         |
| Hu_VK_MTPX_3      | CTACACTTTCCCTACACGACGCTCTCCGATCTATGAGGCTCCCTGCTCAGCTCTGGGGCT                         |
| Hu_VK_MTPX_4      | CTACACTTTCCCTACACGACGCTCTCCGATCTATGAGGCTCCCTGCTCAGCTCTGGGGCT                         |
| Hu_VK_MTPX_5      | CTACACTTTCCCTACACGACGCTCTCCGATCTATGGACATGAGGGTCCCTGCTCAGC                            |
| Hu_VK_MTPX_6      | CTACACTTTCCCTACACGACGCTCTCCGATCTATGGACATGAGRGTCTCGCTCAGC                             |
| Hu_VK_MTPX_7      | CTACACTTTCCCTACACGACGCTCTCCGATCTATGGAAGCCCCAGCACAGCTTCTTCTCC                         |
| Hu_VK_MTPX_8      | CTACACTTTCCCTACACGACGCTCTCCGATCTATGAGGCTCCTTGTCTCAGCTTCTGGGGCT                       |
| Hu_VK_MTPX_9      | CTACACTTTCCCTACACGACGCTCTCCGATCTATGGAAGCCCCAGCTCAGCTTCTCTTCC                         |
| Hu_VK_MTPX_10     | CTACACTTTCCCTACACGACGCTCTCCGATCTATGGACATGAGGGTCCCCGCTCAGC                            |
| Hu_VK_MTPX_11     | CTACACTTTCCCTACACGACGCTCTCCGATCTATGGGGTCCCAGGTTCACTCTCAG                             |
| Hu_VK_MTPX_12     | CTACACTTTCCCTACACGACGCTCTCCGATCTATGGTGTGACAGCCAGGCTTCTTCTCC                          |

|               |                                                                   |
|---------------|-------------------------------------------------------------------|
| Hu_VK_MTPX_13 | CTACACTCTTTCCCTACACGACGCTCTCCGATCTATGGACATGAGGGTGCCCGCTCAGC       |
| Hu_VK_MTPX_14 | CTCTTTCCCTACACGACGCTCTCCGATCTCAGGAAGATGTYGCCATCAAACTCATTGG        |
| Hu_VK_MTPX_15 | CACCTCTTTCCCTACACGACGCTCTCCGATCTCTCRCAATGAGGCTCCCTGCTCAGCTC       |
| Hu_VK_MTPX_16 | CACCTCTTTCCCTACACGACGCTCTCCGATCTCCTGCTCAGCTCYTGGGGCTGCTAATGC      |
| Hu_VK_MTPX_17 | CACCTCTTTCCCTACACGACGCTCTCCGATCTATGGACATGAGGGTGCCCGCTCAGCGCC      |
| Hu_VK_MTPX_18 | CACCTCTTTCCCTACACGACGCTCTCCGATCTATGGACATGAGGGTSCCYGCTCAGCKCC      |
| Hu_VK_MTPX_19 | CACCTCTTTCCCTACACGACGCTCTCCGATCTGCTCCTGGGGCTGCTAATGCTCTGG         |
| Hu_VK_MTPX_20 | CACCTCTTTCCCTACACGACGCTCTCCGATCTGGGGCTCCTGCTGCTCTGGCTCC           |
| Hu_VK_MTPX_21 | CACCTCTTTCCCTACACGACGCTCTCCGATCTGGACATGAGGGTGCCCGCTCAGCTCC        |
| Hu_VL_MTPX_1  | CTACACTCTTTCCCTACACGACGCTCTCCGATCTATGGCCTGGGCTCCACTACTTCTCACCCCTC |
| Hu_VL_MTPX_2  | CTACACTCTTTCCCTACACGACGCTCTCCGATCTATGGCCTGGTCCCCTCTCTTCTCACCCCT   |
| Hu_VL_MTPX_3  | CTACACTCTTTCCCTACACGACGCTCTCCGATCTATGGCCTGGGCTCTGCTCCTCTCACCCCT   |
| Hu_VL_MTPX_4  | CTACACTCTTTCCCTACACGACGCTCTCCGATCTATGGCCTGGAYCCCTCTCTGCTCCCCCTC   |
| Hu_VL_MTPX_5  | CTACACTCTTTCCCTACACGACGCTCTCCGATCTATGGCCTGGGCTCTGCTGCTCCTCACTCT   |
| Hu_VL_MTPX_6  | CTACACTCTTTCCCTACACGACGCTCTCCGATCTATGGCATGGATCCCTCTTCTCTCGGCGTC   |
| Hu_VL_MTPX_7  | CTACACTCTTTCCCTACACGACGCTCTCCGATCTATGGCATGGGCCACACTCCTGCTCCCACTC  |
| Hu_VL_MTPX_8  | CTACACTCTTTCCCTACACGACGCTCTCCGATCTATGGCCTGGGTCTCTTCTACCTACTGCCCT  |
| Hu_VL_MTPX_9  | CTACACTCTTTCCCTACACGACGCTCTCCGATCTATGGCCTGGACTCCTCTTCTCTTGTCTCT   |
| Hu_VL_MTPX_10 | CTACACTCTTTCCCTACACGACGCTCTCCGATCTATGGCCTGGACTCCTCTCTCTCTGTCTCT   |
| Hu_VL_MTPX_11 | CTACACTCTTTCCCTACACGACGCTCTCCGATCTATGAGTGTCCCACCATGGCCTGGATGATGC  |
| Hu_VL_MTPX_12 | CTACACTCTTTCCCTACACGACGCTCTCCGATCTATGGCCTGGGCTCCTCTGCTCCTCACCCCTC |
| Hu_VL_MTPX_13 | CTACACTCTTTCCCTACACGACGCTCTCCGATCTATGRCCDGTCCCTCTCTCTCTCACCCCT    |
| Hu_VL_MTPX_14 | CTACACTCTTTCCCTACACGACGCTCTCCGATCTATGGCCTGGACCCACTCCTCTCTCTTCC    |
| Hu_VL_MTPX_15 | CTACACTCTTTCCCTACACGACGCTCTCCGATCTATGGCCTGGGCTCTGCTCCTCTCASCCT    |
| Hu_VL_MTPX_16 | CTACACTCTTTCCCTACACGACGCTCTCCGATCTATGGCCTGGATCCCTCTACTTCTCCCCCTC  |
| Hu_VL_MTPX_17 | CTACACTCTTTCCCTACACGACGCTCTCCGATCTATGGCCTGGACCSCTCTCTCTCTCRGCTC   |
| Hu_VL_MTPX_18 | CTACACTCTTTCCCTACACGACGCTCTCCGATCTATGGCCTGGACTCTTCTCTCTCTGTCTCT   |
| Hu_VL_MTPX_19 | CTACACTCTTTCCCTACACGACGCTCTCCGATCTATGGCCTGGTCTCTCTCTCTCACTCT      |
| Hu_VL_MTPX_20 | CTACACTCTTTCCCTACACGACGCTCTCCGATCTATGGCCTGGGCTCTGCTCTCTCTGACCCT   |
| Hu_VL_MTPX_21 | CTACACTCTTTCCCTACACGACGCTCTCCGATCTATGGCCTGGACCCCTCTCTGGCTCACTCTC  |
| Hu_VL_MTPX_22 | CTACACTCTTTCCCTACACGACGCTCTCCGATCTATGGCCTGGACCGCTCTCTTCTGAGCCTC   |
| Hu_VL_MTPX_23 | CTACACTCTTTCCCTACACGACGCTCTCCGATCTATGGCTTGGACCCACTCCTCTCTCTCACC   |
| Hu_VL_MTPX_24 | CTACACTCTTTCCCTACACGACGCTCTCCGATCTATGGCCTGGACTCCTCTTCTGTCTCTCC    |
| Hu_VL_MTPX_25 | CACCTCTTTCCCTACACGACGCTCTCCGATCTATGGCCTGGACTCTTCTCTCTCTCTGTG      |
| Hu_VL_MTPX_26 | CACCTCTTTCCCTACACGACGCTCTCCGATCTATGGCCTGGACTCCTCTYCTYCTYTG        |
| Hu_VL_MTPX_27 | CACCTCTTTCCCTACACGACGCTCTCCGATCTATGGCCTGGACCCACTCCTCTCTC          |
| Hu_VL_MTPX_28 | CACCTCTTTCCCTACACGACGCTCTCCGATCTATGGCCTGGGCTCTCTTCTACCTACTGC      |
| Hu_VL_MTPX_29 | CACCTCTTTCCCTACACGACGCTCTCCGATCTGCAGCATCGGAGGTGCCTCAGCCATG        |
| Hu_VL_MTPX_30 | CACCTCTTTCCCTACACGACGCTCTCCGATCTGGCAGAACTCTGGGTGTCTACCCATG        |
| Hu_VL_MTPX_31 | CACCTCTTTCCCTACACGACGCTCTCCGATCTGCAGCACTGGTGGTGCCTCAGCCATG        |
| Hu_VL_MTPX_32 | CACCTCTTTCCCTACACGACGCTCTCCGATCTGGGCTCTGCTCCTCTCACYCTCT           |
| Hu_VL_MTPX_33 | CACCTCTTTCCCTACACGACGCTCTCCGATCTGGGCTCTGCTCTCTCTGACCCTC           |
