# Supplementary material for: High-Quality Library Preparation for NGS-Based Immunoglobulin Germline Gene Inference and Repertoire Expression Analysis
Source: PubMed Central journal article supplement (PMC6459949; doi:10.3389/fimmu.2019.00660), 2019-04-05
Supplement: Table_3.pdf [file Table_3.pdf]

**Supplemental table 3. Primers used for indexing the libraries.**

| <b>Index PCR primers</b> |                                                                  |
|--------------------------|------------------------------------------------------------------|
| <b>5' primers</b>        |                                                                  |
| P5_R1                    | AATGATACGGCGACCACCGAGATCTACACTCTTTCCCTACACGACGCTCTTCCGATCT       |
| <b>3' primers</b>        |                                                                  |
| P7_R2_I1                 | CAAGCAGAAGACGGCATACGAGATCGTGATGTGACTGGAGTTCAGACGTGTGCTCTTCCGATCT |
| P7_R2_I2                 | CAAGCAGAAGACGGCATACGAGATACATCGGTGACTGGAGTTCAGACGTGTGCTCTTCCGATCT |
| P7_R2_I3                 | CAAGCAGAAGACGGCATACGAGATGCCTAAGTGACTGGAGTTCAGACGTGTGCTCTTCCGATCT |
| P7_R2_I4                 | CAAGCAGAAGACGGCATACGAGATTGGTCTGTGACTGGAGTTCAGACGTGTGCTCTTCCGATCT |
| P7_R2_I5                 | CAAGCAGAAGACGGCATACGAGATCACTGTGTGACTGGAGTTCAGACGTGTGCTCTTCCGATCT |
| P7_R2_I6                 | CAAGCAGAAGACGGCATACGAGATATTGGCGTGACTGGAGTTCAGACGTGTGCTCTTCCGATCT |
| P7_R2_I7                 | CAAGCAGAAGACGGCATACGAGATGATCTGGTGACTGGAGTTCAGACGTGTGCTCTTCCGATCT |
| P7_R2_I8                 | CAAGCAGAAGACGGCATACGAGATCAAGTGTGACTGGAGTTCAGACGTGTGCTCTTCCGATCT  |
| P7_R2_I9                 | CAAGCAGAAGACGGCATACGAGATCTGATCGTGACTGGAGTTCAGACGTGTGCTCTTCCGATCT |
| P7_R2_I10                | CAAGCAGAAGACGGCATACGAGATAAGCTAGTGACTGGAGTTCAGACGTGTGCTCTTCCGATCT |
| P7_R2_I11                | CAAGCAGAAGACGGCATACGAGATGTAGCCGTGACTGGAGTTCAGACGTGTGCTCTTCCGATCT |
| P7_R2_I12                | CAAGCAGAAGACGGCATACGAGATTACAAGTGACTGGAGTTCAGACGTGTGCTCTTCCGATCT  |
| P7_R2_I13                | CAAGCAGAAGACGGCATACGAGATTTGACTGTGACTGGAGTTCAGACGTGTGCTCTTCCGATCT |
| P7_R2_I14                | CAAGCAGAAGACGGCATACGAGATGGAAGTGTGACTGGAGTTCAGACGTGTGCTCTTCCGATCT |
| P7_R2_I15                | CAAGCAGAAGACGGCATACGAGATTGACATGTGACTGGAGTTCAGACGTGTGCTCTTCCGATCT |
| P7_R2_I16                | CAAGCAGAAGACGGCATACGAGATGGACGGGTGACTGGAGTTCAGACGTGTGCTCTTCCGATCT |
| P7_R2_I18                | CAAGCAGAAGACGGCATACGAGATGCGGACGTGACTGGAGTTCAGACGTGTGCTCTTCCGATCT |
| P7_R2_I19                | CAAGCAGAAGACGGCATACGAGATTTTACGTGACTGGAGTTCAGACGTGTGCTCTTCCGATCT  |
| P7_R2_I20                | CAAGCAGAAGACGGCATACGAGATGGCCACGTGACTGGAGTTCAGACGTGTGCTCTTCCGATCT |
| P7_R2_I21                | CAAGCAGAAGACGGCATACGAGATCGAAACGTGACTGGAGTTCAGACGTGTGCTCTTCCGATCT |
| P7_R2_I22                | CAAGCAGAAGACGGCATACGAGATCGTACGGTGACTGGAGTTCAGACGTGTGCTCTTCCGATCT |
| P7_R2_I23                | CAAGCAGAAGACGGCATACGAGATCCACTCGTGACTGGAGTTCAGACGTGTGCTCTTCCGATCT |
| P7_R2_I25                | CAAGCAGAAGACGGCATACGAGATATCAGTGTGACTGGAGTTCAGACGTGTGCTCTTCCGATCT |
| P7_R2_I27                | CAAGCAGAAGACGGCATACGAGATAGGAATGTGACTGGAGTTCAGACGTGTGCTCTTCCGATCT |
