# Supplementary material for: High-Quality Library Preparation for NGS-Based Immunoglobulin Germline Gene Inference and Repertoire Expression Analysis
Source: PubMed Central journal article supplement (PMC6459949; doi:10.3389/fimmu.2019.00660), 2019-04-05
Supplement: Table_4.pdf [file Table_4.pdf]

**Supplemental table 4.** Primers used for genomic DNA validation.

| <b>Genomic validation primers</b> |                                   |
|-----------------------------------|-----------------------------------|
| IGHV3-21R                         | CGCCGCAGGCCATGACAGGAAGC           |
| IGHV3-21F                         | CAGCGTCCCACCCTAGAGCTTGT           |
| IGHV3-20_R                        | GCACCTGGTCCCTGAGTTTACTGTGTTC      |
| IGHV3-20_F                        | CACGGGCCAGACAGTGAGACTGG           |
| IGHV3-7_R                         | CCTGGGGAAATTTGACGACGAGGCA         |
| IGHV3-7_F                         | GGGTACAGCCTATTCTCCAGCA            |
| IGHV3-53_R                        | GAGAGGTTCCCTGGGGAACCGT            |
| IGHV3-53_F                        | CTCCTGTAAAATGTAACATTGAAACCTGCCT   |
| IGK1D-8*01_F                      | ACTCCGTCGACTCCTGAGGA              |
| IGK1D-8*01_R                      | GTGTGGCTGCATCTGAGGAACAC           |
| IGLV7-46_F                        | GAGCAGCTGCTTCTCCACAGGAC           |
| IGLV7-46_R                        | CCCCTTCTATGGCTGGTCCAC             |
| IGLV6-57_F                        | CCCAGATCCTCTGCTGTTTTCCCTC         |
| IGLV6-57_R                        | GGGTAGAGGCCAGAGATGCAAGTC          |
| IGLV2-14_F                        | CAGCTGAGCTCCACTATCCAAGGAAGC       |
| IGLV2-14_R                        | GGCCGCACTGCAGGAAGCCGCTTGC         |
| IGLV3-21_F                        | GAGCCCAGACCATGGGACCAGTG           |
| IGLV3-21_R                        | GGGCTGGAGGGAAGGGCAACCTG           |
| IGLV3-25_F                        | CTCCAAGAGGAGTCCCAGAGGAAG          |
| IGLV3-25_R                        | GGGTGAATTTGGCCAAGCCTACTC          |
| IGLV10-54_F                       | CCTCTCTGCTTCAGATCTTTGAGTAACCAGCAC |
| IGLV10-54_R                       | CAGTGCTCTGTGAGGCCTGTTTACG         |
